# Supplementary material for: Sex-Specific Association of Uric Acid and Kidney Function Decline in Taiwan
Source: MDPI journal article supplement (doi:10.3390/jpm11050415), 2021-05-15
Supplement: s1 [file s1]

**Table S1. Risk of renal progression and CKD by hyperuricemia in younger women and men (Less than 50 years old).**

| Gender                | Renal Progression, HR (95% CI) |                       |                            |                       | CKD, HR (95% CI)            |                       |                            |                       |
|-----------------------|--------------------------------|-----------------------|----------------------------|-----------------------|-----------------------------|-----------------------|----------------------------|-----------------------|
|                       | Before propensity weighting    |                       | After propensity weighting |                       | Before propensity weighting |                       | After propensity weighting |                       |
|                       | Crude                          | Adjusted <sup>a</sup> | Crude                      | Adjusted <sup>a</sup> | Crude                       | Adjusted <sup>b</sup> | Crude                      | Adjusted <sup>b</sup> |
| Without Hyperuricemia |                                |                       |                            |                       |                             |                       |                            |                       |
| Men                   | 1.00                           | 1.00                  | 1.00                       | 1.00                  | 1.00                        | 1.00                  | 1.00                       | 1.00                  |
| Women                 | 0.56 (0.30-1.02)               | 1.95 (0.74-5.19)      | 1.15 (0.55-2.40)           | 1.88 (0.68-5.23)      | 0.53 (0.32-0.90)            | 1.60 (0.57-4.51)      | 0.86 (0.50-1.48)           | 2.11 (0.85-5.22)      |
| With Hyperuricemia    |                                |                       |                            |                       |                             |                       |                            |                       |
| Men                   | 1.00                           | 1.00                  | 1.00                       | 1.00                  | 1.00                        | 1.00                  | 1.00                       | 1.00                  |
| Women                 | 0.96 (0.52-1.78)               | 1.51 (0.65-3.54)      | 1.30 (0.71-2.39)           | 2.58 (1.18-5.64)      | 0.67 (0.29-1.53)            | 2.51 (0.57-11.03)     | 1.09 (0.49-2.44)           | 5.49 (1.11-27.19)     |

Abbreviation: CKD, chronic kidney disease; HR, hazard ratio; CI, confidence interval

<sup>a</sup> Adjusted for age, CKD, hypertension, diabetes mellitus, dyslipidemia, gout, stroke, BMI, serum creatinine, cigarette smoking, and alcohol consumption.

<sup>b</sup> Adjusted for age, hypertension, diabetes mellitus, dyslipidemia, gout, stroke, BMI, serum creatinine, cigarette smoking, and alcohol consumption.
